# Supplementary material
Source: bioRxiv or medRxiv preprint supplement (https://www.biorxiv.org/highwire/filestream/117155/field_highwire_adjunct_files/0/263699-1.pdf)
Supplement: Supplementary file [file 263699-1.pdf]

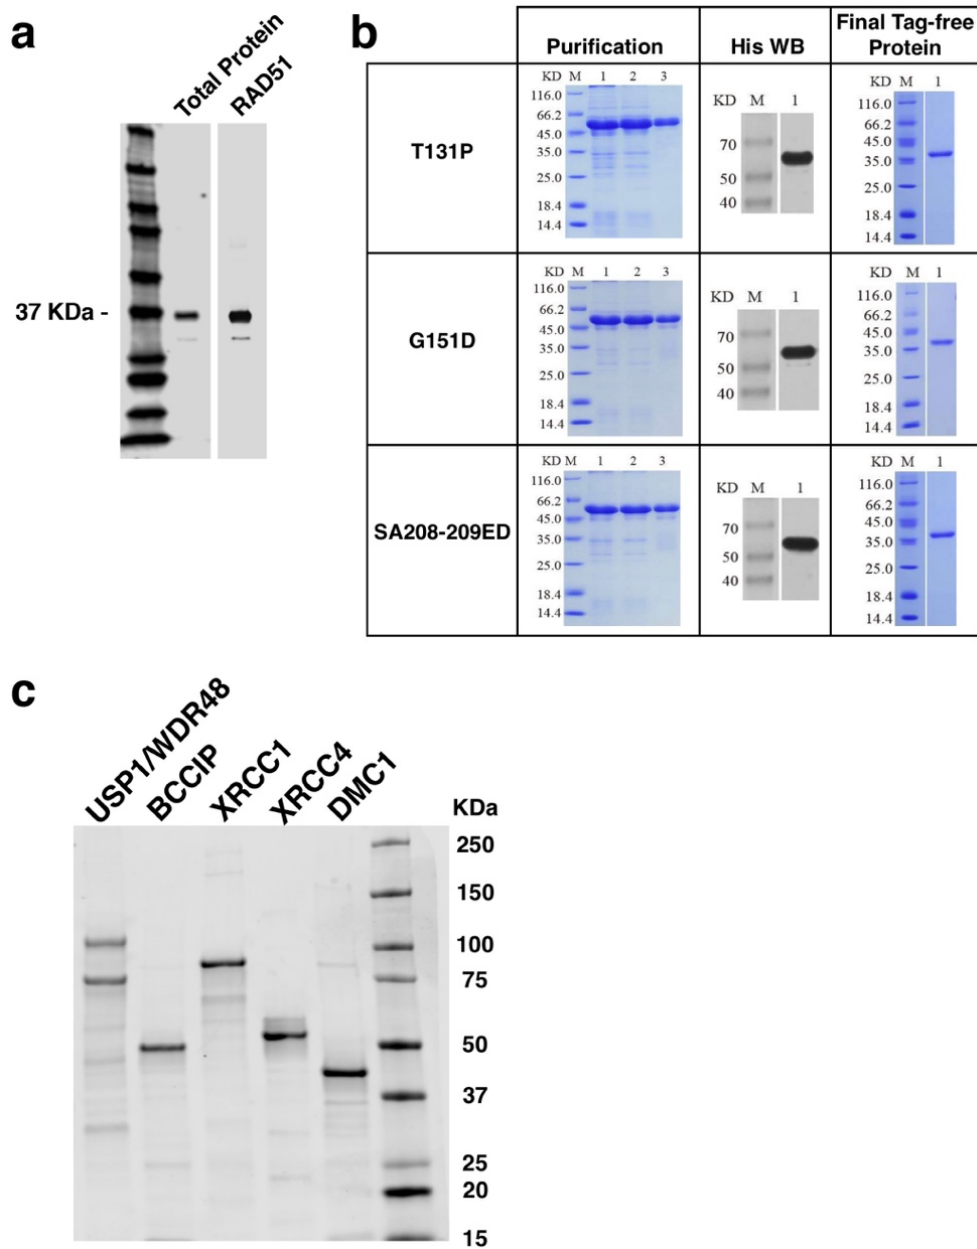

**Supplementary Figure 1 | Verification of Recombinant Protein Identity and Purity.** **a**, Total protein staining and Western blotting of recombinant RAD51. Membrane was stained for total protein, imaged, then stripped and probed with an anti-RAD51 antibody. **b**, Coomassie staining (left, prior to His-tag removal; right, after tag removal) and His-tag Western blotting of recombinant RAD51 mutants produced for injections described in **Figure 4**. **c**, Total protein staining of recombinant DSB repair- and HR-associated proteins used in **Figure 4c** (protein marker on far-right).

| Component                              | Sequence                                                                                                                                    |
|----------------------------------------|---------------------------------------------------------------------------------------------------------------------------------------------|
| tracrRNA                               | AAACAGCAUAGCAAGUUAAAAUAAGGCUAGUCCGU<br>UAUCAACUUGAAAAAGUGGCACCGAGUCGGUGCU                                                                   |
| <i>Chd2</i> <sup>R1684H</sup><br>crRNA | <b>GCGGUAGCUCCCAGAACGGU</b> GUUUUAGAGCUAUGC<br>UGUUUUG                                                                                      |
| <i>Chd2</i> <sup>R1684H</sup><br>ssODN | TCAGTATGAGCAGCATTGGTATAAGGACCACCACTA<br>TGGTGACCGGAGGCATATGGATGCTCACCATTCTGG<br>GAGCTACCGCCCTAACAAACATGTCCAGAAAGAGGCC<br>GTATGAGCAGTACAACAG |
| <i>Tyr</i> <sup>C89S</sup><br>crRNA    | <b>GAAGUUGCCUGAGCACUGGC</b> GUUUUAGAGCUAUGC<br>UGUUUUG                                                                                      |
| <i>Tyr</i> <sup>C89S</sup><br>ssODN    | GTTCCCCTTCAAAGGGGTGGATGACCGTGAGTCCTGG<br>CCCTCTGTGTTTTATAATAGGACAAGCCAGTGCTCAG<br>GCAACTTCATGGGTTTCAACTGCGGAAACTGTAAGTT<br>TGGATTTGGGG      |

**Supplementary Table 1 | Sequences of tracrRNA, crRNAs, and HR donors.** Guide sequences are highlighted in red.

| RAD51 Mutant       | DNA Sequence                                                                                                                                                                                                                                                                                                                                                                                                                                                                                                                                                                                                                                                                                                                                                                                                                                                                                                                                                                                                                                                                                                   |
|--------------------|----------------------------------------------------------------------------------------------------------------------------------------------------------------------------------------------------------------------------------------------------------------------------------------------------------------------------------------------------------------------------------------------------------------------------------------------------------------------------------------------------------------------------------------------------------------------------------------------------------------------------------------------------------------------------------------------------------------------------------------------------------------------------------------------------------------------------------------------------------------------------------------------------------------------------------------------------------------------------------------------------------------------------------------------------------------------------------------------------------------|
| <b>T131P</b>       | <p>atggcaatgcagatgcagctgaagcaaatgcagatactcagtggaagaagaaagcttggccacaaccatttcacgggttag<br/> agcagtggtgcataaatgccaacgatgtgaagaaattggaagaagctggattccatactgtggaggctgttcctatgcgcaaag<br/> aaggagctaataaataattaaggaattagtgaaagcaagctgataaaattctgacggagctcgcctctgttgcaggctggagtg<br/> caatagcgtgatcttggctactgcacctccgctctcaggtcaagtgattctctgctcagcctccgagtagtgggactacag<br/> gtggaattgagactggatctatcacagaaatggtggagaattccga<u>ct</u>gggaagaccagatctgtacacgctagctgtcacct<br/> gccagctcccattgaccggggtggaggtaaggaaaggccatgtacattgacactgagggtacctttaggccagaacggctgtct<br/> ggcagtggtgagaggatggtctctctggcagtgatgtcctggataatgtagcatatgctcgagcgttaacacagaccaccagac<br/> ccagctcctttatcaagcatcagccatgatggtagaatctaggtatgcactgcttattgtagacagtgccaccgcccttacagaaca<br/> gactactcgggtcgaggtagcttccagccaggcagatgcactggccaggtttctcgggatgcttctgcgactcgtgatgagttgg<br/> ttagcagtggtaatcactaatcaggtggtagctcaagtggatggagcagcgatgtttgctgctgatccaaaaaacctattggagg<br/> aaatatcatcgccatgatcaacaaccagattgtatctgaggaaaggaagaggggaaaccagaatctgcaaaaatctacgactc<br/> tcctgtcttctgaagctgaagctatgttcgccattaatgcagatggagtgaggatgccaagactga</p>    |
| <b>G151D</b>       | <p>atggcaatgcagatgcagctgaagcaaatgcagatactcagtggaagaagaaagcttggccacaaccatttcacgggttag<br/> agcagtggtgcataaatgccaacgatgtgaagaaattggaagaagctggattccatactgtggaggctgttcctatgcgcaaag<br/> aaggagctaataaataattaaggaattagtgaaagcaagctgataaaattctgacggagctcgcctctgttgcaggctggagtg<br/> caatagcgtgatcttggctactgcacctccgctctcaggtcaagtgattctctgctcagcctccgagtagtgggactacag<br/> gtggaattgagactggatctatcacagaaatggtggagaattccgaactgggaagaccagatctgtacacgctagctgtcacct<br/> gccagctcccattgaccgggga<u>at</u>ggaggtaaggaaaggccatgtacattgacactgagggtacctttaggccagaacggctgtct<br/> ggcagtggtgagaggatggtctctctggcagtgatgtcctggataatgtagcatatgctcgagcgttaacacagaccaccagac<br/> ccagctcctttatcaagcatcagccatgatggtagaatctaggtatgcactgcttattgtagacagtgccaccgcccttacagaaca<br/> gactactcgggtcgaggtagcttccagccaggcagatgcactggccaggtttctcgggatgcttctgcgactcgtgatgagttgg<br/> ttagcagtggtaatcactaatcaggtggtagctcaagtggatggagcagcgatgtttgctgctgatccaaaaaacctattggagg<br/> aaatatcatcgccatgatcaacaaccagattgtatctgaggaaaggaagaggggaaaccagaatctgcaaaaatctacgactc<br/> tcctgtcttctgaagctgaagctatgttcgccattaatgcagatggagtgaggatgccaagactga</p> |
| <b>SA208-209ED</b> | <p>atggcaatgcagatgcagctgaagcaaatgcagatactcagtggaagaagaaagcttggccacaaccatttcacgggttag<br/> agcagtggtgcataaatgccaacgatgtgaagaaattggaagaagctggattccatactgtggaggctgttcctatgcgcaaag<br/> aaggagctaataaataattaaggaattagtgaaagcaagctgataaaattctgacggagctcgcctctgttgcaggctggagtg<br/> caatagcgtgatcttggctactgcacctccgctctcaggtcaagtgattctctgctcagcctccgagtagtgggactacag<br/> gtggaattgagactggatctatcacagaaatggtggagaattccgaactgggaagaccagatctgtacacgctagctgtcacct<br/> gccagctcccattgaccggggtggaggtaaggaaaggccatgtacattgacactgagggtacctttaggccagaacggctgtct<br/> ggcagtggtgagaggatggtctctctggcagtgatgtcctggataatgtagcatatgctcgagcgttaacacagaccaccagac<br/> ccagctcctttatcaagca<u>gaaga</u>catgatggtagaatctaggtatgcactgcttattgtagacagtgccaccgcccttacagaaca<br/> gactactcgggtcgaggtagcttccagccaggcagatgcactggccaggtttctcgggatgcttctgcgactcgtgatgagttgg<br/> ttagcagtggtaatcactaatcaggtggtagctcaagtggatggagcagcgatgtttgctgctgatccaaaaaacctattggagg<br/> aaatatcatcgccatgatcaacaaccagattgtatctgaggaaaggaagaggggaaaccagaatctgcaaaaatctacgactc<br/> tcctgtcttctgaagctgaagctatgttcgccattaatgcagatggagtgaggatgccaagactga</p>   |

**Supplementary Table 2 | DNA Sequences for the Cloning and Production of Recombinant RAD51 Mutant Proteins.** Mutated nucleotides are **bold, underlined, and highlighted in red.**

| Forward Primer | Sequence                  | Reverse Primer  | Sequence                 | Product Size (bp) |
|----------------|---------------------------|-----------------|--------------------------|-------------------|
| C2RH-Long_F1   | ACTGACACATGGGAGAAGCC      | C2RH-Long_R1    | TCTCCTTATAACAGGCCAACC    | 429               |
| C2RH-short_F1  | AGTGCCTCACCTCTCACACC      | C2RH-short_R1   | ACTGGCAGAGGGAAAGAAAG     | 266               |
| C2RH-Long_F2   | TCACTGGGTCACAAGCAAAG      | C2RH-Long_R2    | GAAGCAGATGCCCATCTCAG     | 1279              |
| C2RH-Short_F2  | ACTGACACATGGGAGAAGCC      | C2RH-Short_R2   | GATCGAGGAGACTGGCAGAG     | 358               |
| Tyr-Long_F     | TCAATTTAGTTACCTCACTATGGGC | Tyr-Long_R      | CAAGTACTCATCTGTGCAAATGTC | 992               |
| Tyr-Short_F    | TTTGGCCATAGGTGCCTG        | Tyr-Short_R     | GAGCCTGTGCCTCCTCTAAG     | 411               |
| Shank3-Long_F  | AGGAAAGCAAGGTTGAGCTG      | Shank3-Long_R   | CTCTGAGGCTTGCAGACGG      | 584               |
| Shank3-Short_F | GAGCTCTACTCCCTTAGGACTT    | Shank3-Short_R  | TCCCCCTTTCACTGGACACCC    | 316               |
| Gapdh-Long_F   | TACGGGTGCACGTAGCTCAG      | Gapdh-Long_R    | CGAAGGACACCAGGCAGTC      | 396               |
| Gapdh-Short_F  | TCCCTAGACCCGTACAGTGC      | Gapdh - Short_R | CTCTGCTCCTCCCTGTTCC      | 133               |

**Supplementary Table 3 | Sequences of PCR primers and expected product sizes.** C2RH-Long/short\_F1/R1 primers were used for experiments performed in **Figures 1-3**, as well as **Extended Data Figures 1 and 2**. In an attempt to further rule out large deletions as a source of apparent homozygosity, we designed a new genotyping strategy with an initial ~1.3kb amplicon and used primer sets C2RH-Long/Short\_F2/R2 for all other experiments.
